# Supplementary material for: TGFBR1 Variants Can Associate with Non-Syndromic Congenital Heart Disease without Aortopathy
Source: MDPI journal article supplement (doi:10.3390/jcdd10110455), 2023-11-09
Supplement: s1 [file s1]

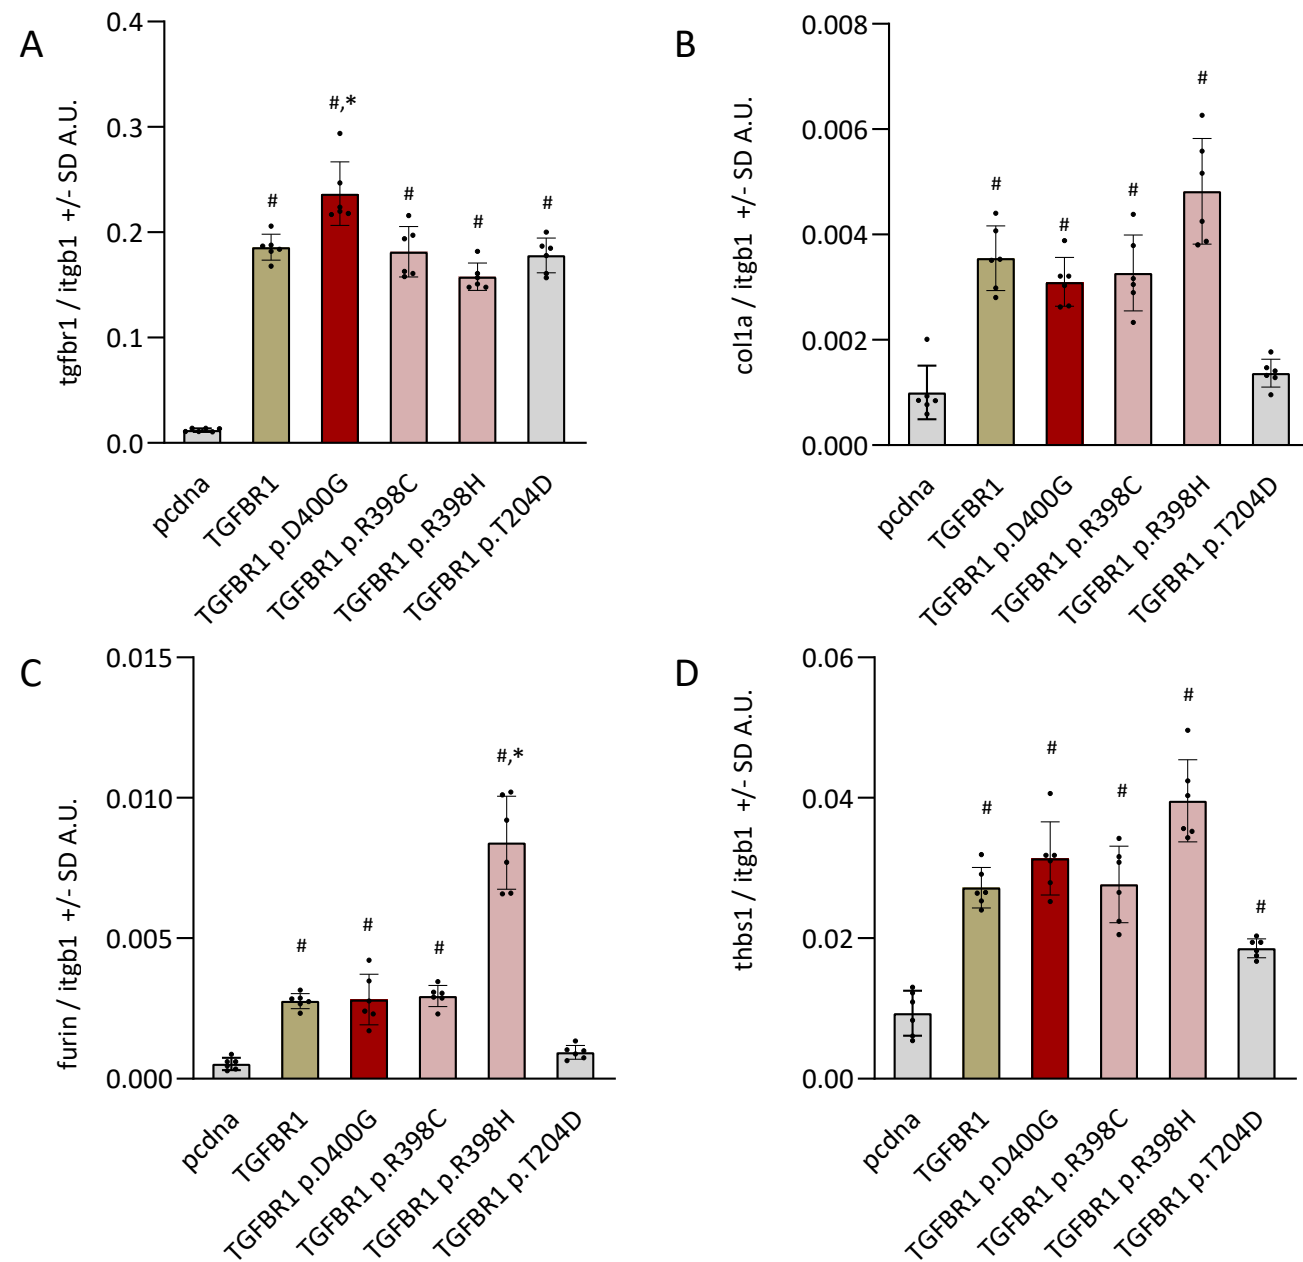

**Supplementary Figure S1.** qPCR of various genes involved in TGFB signaling in 3T3 cells that were stimulated for 24h with TGFB1. \*P ≤ 0.05 in relation to WT TGFB1, #P ≤ 0.05 in relation to pcdna (background), n=6 per condition.

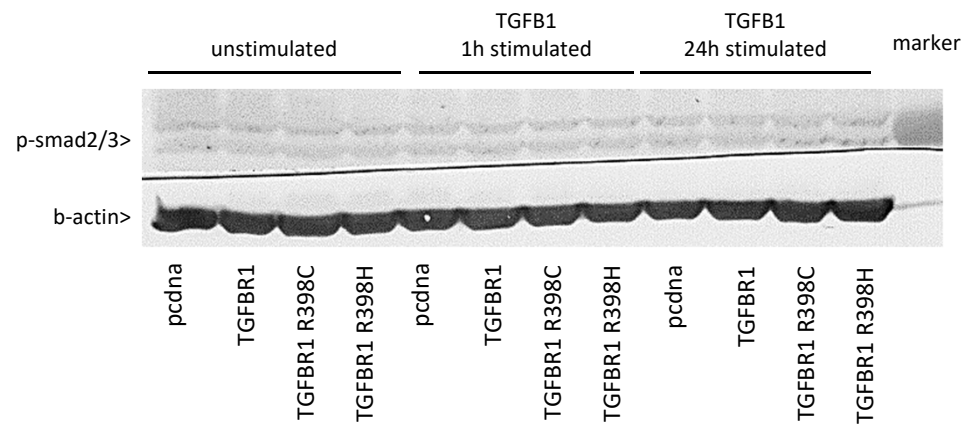

**Supplementary Figure S2.** Westernblot for phosposmad2/3 and b-actin in 3T3 cells that were unstimulated, stimulated for 1h or 24h with TGFB1. 3T3 cells were either untransfected (pcdna) or transfected with wildtype or the R398 TGFB1 variants.

| Patient characteristics family A | Sex/age | Age at diagnosis of CHD and/or low atrial rhythm | Age (years) at last available ECG | Low atrial rhythm | Rhythm/conduction disturbances                                                                | Congenital heart defects                                                                                    |
|----------------------------------|---------|--------------------------------------------------|-----------------------------------|-------------------|-----------------------------------------------------------------------------------------------|-------------------------------------------------------------------------------------------------------------|
| II-1                             | F/83    | 74 years                                         | 77                                | +                 | AF                                                                                            | —                                                                                                           |
| II-2                             | M/89    | 84 years                                         | 84                                | ±                 | Bradycardia, atrial/ventricular arrhythmia, AFa                                               | —                                                                                                           |
| II-3                             | M/87    | 78 years                                         | 80                                | —                 | Bradycardia, junctional escapes, AF, complete RBBB                                            | —                                                                                                           |
| III-3                            | F/57    | 50 years                                         | 57                                | +                 | Paroxysmal SVT                                                                                | LSVC, aberrant right subclavian artery                                                                      |
| III-4                            | M/50    | —                                                | 43                                | —                 | —                                                                                             | —                                                                                                           |
| III-5                            | M/47    | 40 years                                         | 40                                | +                 | First-degree AV block, incomplete RBBB                                                        | —                                                                                                           |
| III-6                            | M/61    | 10 years                                         | 36                                | ±                 | Complete RBBB                                                                                 | Tetralogy of Fallot, LSVC                                                                                   |
| III-7                            | M/59    | —                                                | 58                                | —                 | Sinus bradycardia                                                                             | —                                                                                                           |
| III-8                            | M/54    | —                                                | 53                                | —                 | —                                                                                             | —                                                                                                           |
| III-9                            | F/47    | 4 years                                          | 38                                | +                 | Bradycardia, atrial arrests with AV junctional escapes, intermittent complete AV dissociation | Suspicion of abnormal atrial appendage                                                                      |
| III-10                           | M/60    | 52 years                                         | 52                                | +                 | Bradycardia                                                                                   | —                                                                                                           |
| III-11                           | F/52    | —                                                | 45                                | —                 | —                                                                                             | —                                                                                                           |
| III-12                           | F/50    | —                                                | 43                                | —                 | —                                                                                             | —                                                                                                           |
| IV-1                             | F/28    | 21 years                                         | 28                                | +                 | —                                                                                             | —                                                                                                           |
| IV-2                             | M/25    | 24 years                                         | 24                                | ±                 | —                                                                                             | —                                                                                                           |
| IV-3                             | F/23    | 2 months                                         | 16                                | +                 | Incomplete RBBB                                                                               | ASD II, membrane in left atrium, LSVC, absent brachiocephalic vein                                          |
| IV-4                             | F/17    | Birth                                            | 16                                | —                 | Chronic SVT, atrial extrasystoles                                                             | —                                                                                                           |
| IV-5                             | F/28    | 4 years                                          | 28                                | +                 | Incomplete RBBB                                                                               | Systolic murmur                                                                                             |
| IV-6                             | M/34    | —                                                | 33                                | —                 | —                                                                                             | —                                                                                                           |
| IV-7                             | F/31    | —                                                | 24                                | —                 | —                                                                                             | —                                                                                                           |
| IV-8                             | F/18    | <0.5 years                                       | 18                                | +                 | Incomplete RBBB                                                                               | Incomplete AVSD, ASD II, LSVC draining into left atrium, absent coronary sinus, absent brachiocephalic vein |
| IV-9                             | F/36    | 32 years                                         | 32                                | +                 | —                                                                                             | —                                                                                                           |
| IV-10                            | F/33    | <0.5 years                                       | 33                                | +                 | Incomplete RBBB                                                                               | Incomplete AVSD, common atrium, bilateral left atrial appendages                                            |

Table S1

| Family A pedigree ID as reported in vd Meerakker 2009 | Affected as in vd Meerakker 2009 | Carrier of p.R398C | Ultrasound data aorta? | Heart/aorta data extracted from clinical records             | Ultrasound details if available                                                                                                      |
|-------------------------------------------------------|----------------------------------|--------------------|------------------------|--------------------------------------------------------------|--------------------------------------------------------------------------------------------------------------------------------------|
| II-1                                                  | y                                | y                  | y                      | aorta not mentioned, echo heart performed 79y                | Ultrasound at age 79 was considered normal, aortic dimensions not specifically mentioned                                             |
| husband of II-1                                       | n                                | n                  | y                      | ct thorax: aorta mentioned, but not described as widened 77y | Cardiac ultrasound at age 85 considered normal, no dimensions mentioned                                                              |
| II-2                                                  | y                                | y                  | n                      | no imaging performed 86y                                     | n/a                                                                                                                                  |
| wife of II-2                                          | n                                | n                  | n                      | no clinical records                                          | n/a                                                                                                                                  |
| II-3                                                  | y                                | y                  | y                      | deceased 2005; echo 80y, aorta 41 mm                         | Cardiac ultrasound at age 80, ascending aorta 32mm                                                                                   |
| III-3                                                 | y                                | y                  | y                      | 2017 dilated sinus coronarius                                | Cardiac ultrasound age 70, normal, no dimensions mentioned                                                                           |
| III-4                                                 | n                                | n                  | y                      | 2002: echo performed. Aorta not measured                     | Cardiac ultrasound age 43 normal, no dimensions mentioned                                                                            |
| III-5                                                 | y                                | y                  | y                      | 2002: aorta 31 mm (40 jr)                                    | Cardiac Ultrasound aortic root 31 mm, age 40                                                                                         |
| wife of III-5                                         | n                                | n                  | n                      | no imaging                                                   | n/a                                                                                                                                  |
| III-6                                                 | y                                | y                  | n                      | no clinical records                                          | n/a                                                                                                                                  |
| III-7                                                 | n                                | n                  | n                      | no imaging                                                   | n/a                                                                                                                                  |
| III-8                                                 | n                                | n                  | n                      | 2009 visited cardiologist, no further info                   | n/a                                                                                                                                  |
| III-9                                                 | y                                | y                  | n                      | 2016 echo performed: no mention of aneurysma                 | n/a                                                                                                                                  |
| husband of III-9                                      | n                                | n                  | n                      | married in, no records                                       | n/a                                                                                                                                  |
| III-10                                                | y                                | y                  | n                      | no clinical records                                          | n/a                                                                                                                                  |
| wife of III-10                                        | n                                | n                  | n                      | married in, no records                                       | n/a                                                                                                                                  |
| III-11                                                | n                                | y                  | y                      | 2003 aorta 30mm                                              | Cardiac ultrasound age 46, aortic root 30mm                                                                                          |
| III-12                                                | n                                | n                  | y                      | 2003 aorta 28 mm                                             | Cardiac ultrasound age 44, aortic root 28mm                                                                                          |
| III-13                                                | n                                | n                  | y                      | 2003 aorta 28 mm                                             | Cardiac ultrasound age 46, aortic root 28mm                                                                                          |
| IV-1                                                  | y                                | y                  | n                      | 2003: 28 mm (21yr)                                           | ultrasound age 21, aortic root 29 mm                                                                                                 |
| IV-2                                                  | y                                | y                  | n                      | 2009: normal heart, no dimensions mentioned                  | n/a                                                                                                                                  |
| IV-3                                                  | y                                | y                  | n                      | ASD type II, no specific information on aorta                | n/a                                                                                                                                  |
| IV-4                                                  | y                                | y                  | n                      | no imaging                                                   | n/a                                                                                                                                  |
| IV-5                                                  | y                                | y                  | y                      | 2002: aorta 27 mm                                            | Cardiac ultrasound age 20, aortic root 27mm                                                                                          |
| IV-7                                                  | n                                | n                  | y                      | 2002: aorta 30 mm                                            | Cardiac ultrasound age 24, aortic root 30mm                                                                                          |
| IV-8                                                  | y                                | y                  | y                      | 2014: coarctatio aorta Aorta ascendens: 27 mm.               | Surgery for incomplete AVSD, mild aortic coarctation, MRI ascending aorta 27mm, coarctation in the descending aorta, 13x15mm, age 23 |
| IV-9                                                  | y                                | y                  | n                      | 2006: echo performed, aorta not measured                     | n/a                                                                                                                                  |
| IV-10                                                 | y                                | y                  | n                      | Multiple echos, aorta diameter not mentioned                 | n/a                                                                                                                                  |

Table S2

| Patient characteristics family B | 1 <sup>st</sup> Child (proband)                                                                                                                                                                                        | 2 <sup>nd</sup> Child                                                               |
|----------------------------------|------------------------------------------------------------------------------------------------------------------------------------------------------------------------------------------------------------------------|-------------------------------------------------------------------------------------|
| Gender                           | M                                                                                                                                                                                                                      | F                                                                                   |
| Age                              | 7y                                                                                                                                                                                                                     | 21months                                                                            |
| Weight                           | 17.6kg                                                                                                                                                                                                                 | 8.5kg                                                                               |
| Hight                            | 119cm                                                                                                                                                                                                                  | 74cm                                                                                |
| Clinical features                | Large ASD, large inlet VSD, dysplastic and straddling mitral valve, Tricuspid valve hypoplasia and right ventricular hypoplasia                                                                                        | Complete AVSD with small left atrioventricular valve and common atrium              |
| Aortopathy                       | Competent aortic valve, no dissection                                                                                                                                                                                  | Competent aortic valve, no dissection                                               |
| Cardiovascular Symptoms          | Post-surgery accelerated junctional rhythm                                                                                                                                                                             | Depressed cardiac function and moderate common atrioventricular valve regurgitation |
| Surgical Procedures              | Pulmonary artery banding at 3 months of age then cavo-pulmonary shunt (BCPS) and tightening of the pulmonary artery band at the age of 19 months then completion of Fontan operation was done at the age of 2.5 years. | Pulmonary artery banding                                                            |
| Dysmorphism                      | None                                                                                                                                                                                                                   | None                                                                                |
| Motor development                | Normal                                                                                                                                                                                                                 | Normal                                                                              |
| Mental Development               | Normal                                                                                                                                                                                                                 | Normal                                                                              |
| Neurological Abnormalities       | Normal                                                                                                                                                                                                                 | Normal                                                                              |

Table S3

| ID               | Chromosome | Position (hg19) | Ref | Alt | Transcript        | Aminoacid change | cDNA change | CADD PHRED | CADD RAW | SIFT        | gnomAD AF | rsID        | PFAM domain           | ACMG/AMP classification | ACMG/AMP evidence                     |
|------------------|------------|-----------------|-----|-----|-------------------|------------------|-------------|------------|----------|-------------|-----------|-------------|-----------------------|-------------------------|---------------------------------------|
| variant family A | 9          | 101908828       | C   | T   | ENST00000374994.4 | p.R398C          | c.1192C>T   | 23.8       | 3.093413 | tolerated   | 0/251180  | NA          | Protein kinase domain | Pathogenic (II)         | PS3, PS4, PP1-S, PM2, PP1-M, PM1, PP1 |
| variant family B | 9          | 101908829       | G   | A   | ENST00000374994.4 | p.R398H          | c.1193G>A   | 24.2       | 3.256756 | deleterious | 1/251180  | rs200657153 | Protein kinase domain | Pathogenic (II)         | PS3, PS4, PP1-S, PM2, PP1-M, PM1, PP1 |

Table S4
